# Supplementary material
Source: PubMed Central journal article supplement (PMC6732381)
Supplement: rspb20191498supp1.pdf [file rspb20191498supp1.pdf]

## Electronic supplementary material

Cayueta et al. Slow life-history strategies are associated with negligible actuarial senescence in Western Palearctic salamanders.

**Table S1.** Information about age-dependent capture-recapture data in four populations of *Lyciasalamandra fazilae*, *Salamandrina perspicillata*, and *Salamandra salamandra* (two populations). The mean adult lifespan was calculated using the following formulae:  $a+(s/(1+s))$  where  $s$  is the survival at adult stage and  $a$  is the age at sexual maturity. Age at sexual maturity were obtained from the following references: *L. fazilae*, Olgun et al. 2001; *S. perspicillata*, Angelini et al. 2010; and *S. Salamandra*, Reinhard et al. 2015 (in *Salamandra algira*).

| Parameter                    | <i>L. fazilae</i> | <i>S. perspicillata</i> | <i>S. salamandra 1</i> | <i>S. salamandra 2</i> |
|------------------------------|-------------------|-------------------------|------------------------|------------------------|
| Number of individuals        | 133               | 911                     | 304                    | 376                    |
| Number with known birth year | 67                | 55                      | 0                      | 0                      |
| Number with known death year | 5                 | 0                       | 0                      | 0                      |
| Total number of captures     | 179               | 1629                    | 609                    | 1474                   |
| Earliest detection time      | 1999              | 1998                    | 2008                   | 1965                   |
| Latest detection time        | 2009              | 2006                    | 2015                   | 1985                   |
| Earliest recorded birth year | 1990              | 1994                    | 0                      | 0                      |
| Latest recorded birth year   | 1997              | 2002                    | 0                      | 0                      |
| Earliest recorded death year | 2000              | 0                       | 0                      | 0                      |
| Latest recorded death year   | 2003              | 0                       | 0                      | 0                      |
| Total survey length (years)  | 11                | 9                       | 8                      | 21                     |
| Mean adult lifespan          | 6                 | 9.5                     | 8.5                    | 8.5                    |

### References cited

- Angelini, C., Antonelli, D., & Utzeri, C. (2010). Capture-mark-recapture analysis reveals survival correlates in *Salamandrina perspicillata* (Savi, 1821). *Amphibia-Reptilia*, 31, 21-26.
- Olgun, K., Miaud, C., & Gautier, P. (2001). Age, growth, and survivorship in the viviparous salamander *Mertensiella luschani* from southwestern Turkey. *Canadian Journal of Zoology*, 79, 1559-1567.
- Reinhard, S., Renner, S., & Kupfer, A. (2015). Age and fecundity in *Salamandra algira* (Caudata: Salamandridae). *Salamandra*, 51(1), 19-24.

**Table S2.** Multievent survival and recruitment models: model selection procedure.  $r$  = model rank,  $k$  = number of parameters, Dev. = residual deviance, AICc = Akaike Information Criterion adjusted for small sample size,  $\Delta$ AICc = difference of AICc points with the best-supported model,  $w$  = AICc weight.

| $r$                | Model                                                     | $k$ | Dev.   | AICc   | $\Delta$ AICc | $w$  |
|--------------------|-----------------------------------------------------------|-----|--------|--------|---------------|------|
| Survival models    |                                                           |     |        |        |               |      |
| 1                  | $\varphi(\cdot), \delta(\cdot), p(t + \text{size})$       | 14  | 491.70 | 522.46 | 0.00          | 0.54 |
| 2                  | $\varphi(\cdot), \delta(\cdot), p(t)$                     | 13  | 495.99 | 524.37 | 1.90          | 0.21 |
| 3                  | $\varphi(\text{size}), \delta(\cdot), p(t + \text{size})$ | 15  | 491.34 | 524.52 | 2.06          | 0.19 |
| 4                  | $\varphi(\text{size}), \delta(\cdot), p(t)$               | 14  | 495.96 | 526.73 | 4.26          | 0.06 |
| 5                  | $\varphi(\cdot), \delta(\cdot), p(\cdot)$                 | 4   | 541.93 | 550.18 | 27.72         | 0.00 |
| 6                  | $\varphi(\text{size}), \delta(\cdot), p(\cdot)$           | 5   | 541.79 | 552.16 | 29.70         | 0.00 |
| 7                  | $\varphi(\cdot), \delta(\cdot), p(\text{size})$           | 5   | 541.93 | 552.30 | 29.84         | 0.00 |
| 8                  | $\varphi(\text{size}), \delta(\cdot), p(\text{size})$     | 6   | 541.72 | 554.25 | 31.78         | 0.00 |
| Recruitment models |                                                           |     |        |        |               |      |
| 1                  | $\psi(\cdot), \delta(\cdot), p(t + \text{size})$          | 8   | 265.89 | 283.01 | 0.00          | 0.63 |
| 2                  | $\psi(\cdot), \delta(\cdot), p(t)$                        | 7   | 269.27 | 284.13 | 1.12          | 0.36 |
| 3                  | $\psi(\cdot), \delta(\cdot), p(\text{size})$              | 5   | 284.16 | 294.61 | 11.60         | 0.00 |
| 4                  | $\psi(\cdot), \delta(\cdot), p(\cdot)$                    | 4   | 286.32 | 294.62 | 11.61         | 0.00 |

**Table S3.** Deviance information criterion (DIC) for each of the mortality function in three salamanders of western Palearctic. We considered the four mortality functions implemented in BaSTA program: exponential (EXP), Gompertz (GOM), Weibull (WEI) and logistic (LOG). For the three last functions, we considered three potential shapes: simple that only uses the basic functions described above (“Simple”); Makeham (“Makeham”); and bathtub (“Bath”).

|                                     | <i>Simple</i>  | <i>Bath</i>     | <i>Makeham</i> |
|-------------------------------------|----------------|-----------------|----------------|
| <i>Lyciasalamandra fazilae</i>      |                |                 |                |
| Logistic                            | Not converged  | Not converged   | 1909.03        |
| Exponential                         | <b>1593.92</b> | -               | -              |
| Gompertz                            | 1626.67        | Not converged   | 1946.88        |
| Weibull                             | 1709.25        | Not converged   | 1701.72        |
| <i>Salamandrina perspicillata</i>   |                |                 |                |
| Logistic                            | 15394.47       | 14928.48        | 15382.08       |
| Exponential                         | Not converged  | -               | -              |
| Gompertz                            | Not converged  | <b>14881.98</b> | Not converged  |
| Weibull                             | 15530.53       | 14898.80        | 15238.54       |
| <i>Salamandra Salamandra (pop1)</i> |                |                 |                |
| Logistic                            | 6704.18        | Not converged   | 6723.45        |
| Exponential                         | Not converged  | -               | -              |
| Gompertz                            | 6479.37        | Not converged   | Not converged  |
| Weibull                             | <b>6319.93</b> | Not converged   | 6711.14        |
| <i>Salamandra Salamandra (pop2)</i> |                |                 |                |
| Logistic                            | 6099.82        | 6108.51         | 6101.58        |
| Exponential                         | 6137.15        | -               | -              |
| Gompertz                            | 6161.98        | <b>6045.60</b>  | 6151.98        |
| Weibull                             | 6067.80        | 6111.62         | 6080.74        |
